# Supplementary material for: A newly developed highly selective Zn2+–AcO− ion-pair sensor through partner preference: equal efficiency under solitary and colonial situation
Source: Royal Society of Chemistry journal article supplement (doi:10.1039/c8dt00362a), 2018-01-01
Supplement: c8dt00362a1.pdf [file c8dt00362a1.pdf]

## Electronic Supporting Information (ESI)

### **A Newly Developed Highly Selective Zn<sup>2+</sup>-AcO<sup>-</sup> Ion-pair Sensor through Partner Preference: Equal Efficiency under Solitary and Colonial Situation**

**Monaj Karar<sup>1</sup>, Suwendu Paul<sup>1</sup>, Bhaskar Biswas<sup>2</sup>, Tapas Majumdar<sup>1\*</sup>, and Arabinda Mallick<sup>3\*</sup>**

<sup>1</sup>*Department of Chemistry, University of Kalyani, Nadia, West Bengal- 741235, India*

<sup>2</sup>*Department of Chemistry, Surendranath College, Kolkata, West Bengal -700009, India*

<sup>3</sup>*Department of Chemistry, Kashipur Michael Madhusudan Mahavidyalaya, Purulia, West Bengal -723132, India.*

E-mail AM: [ampeju@yahoo.co.in](mailto:ampeju@yahoo.co.in); TM: [tapasmju@gmail.com](mailto:tapasmju@gmail.com)

---

#### Contents

---

| Serial No |                                                                                                                           | Page No |
|-----------|---------------------------------------------------------------------------------------------------------------------------|---------|
| 1         | NMR spectrum of HBP                                                                                                       | S2      |
| 2         | IR spectrum of HBP                                                                                                        | S2      |
| 3         | Mass spectrum of HBP                                                                                                      | S3      |
| 4         | Elemental analysis of HBP                                                                                                 | S3      |
| 5         | 3D fluorescence spectra of HBP and HBP-Zn(AcO) <sub>2</sub> complex                                                       | S4      |
| 6         | Fluorescence emission spectra of HBP in different solvents.                                                               | S4      |
| 7         | Emission selectivity of HBP towards Zn(AcO) <sub>2</sub> in the presence of only one other metal salt                     | S5      |
| 8         | Emission selectivity of HBP towards Zn(AcO) <sub>2</sub> in the presence of other competitive metal salts                 | S5      |
| 9         | Emission selectivity of HBP towards Zn(AcO) <sub>2</sub> with different sources for Zn <sup>II</sup> and AcO <sup>-</sup> | S6      |
| 10        | Calculation of quantum yield of HBP-Zn(AcO) <sub>2</sub> complex                                                          | S6      |
| 11        | Calculation of limit of detection                                                                                         | S7      |

---

## Characterization of HBP:

### 1. NMR result:

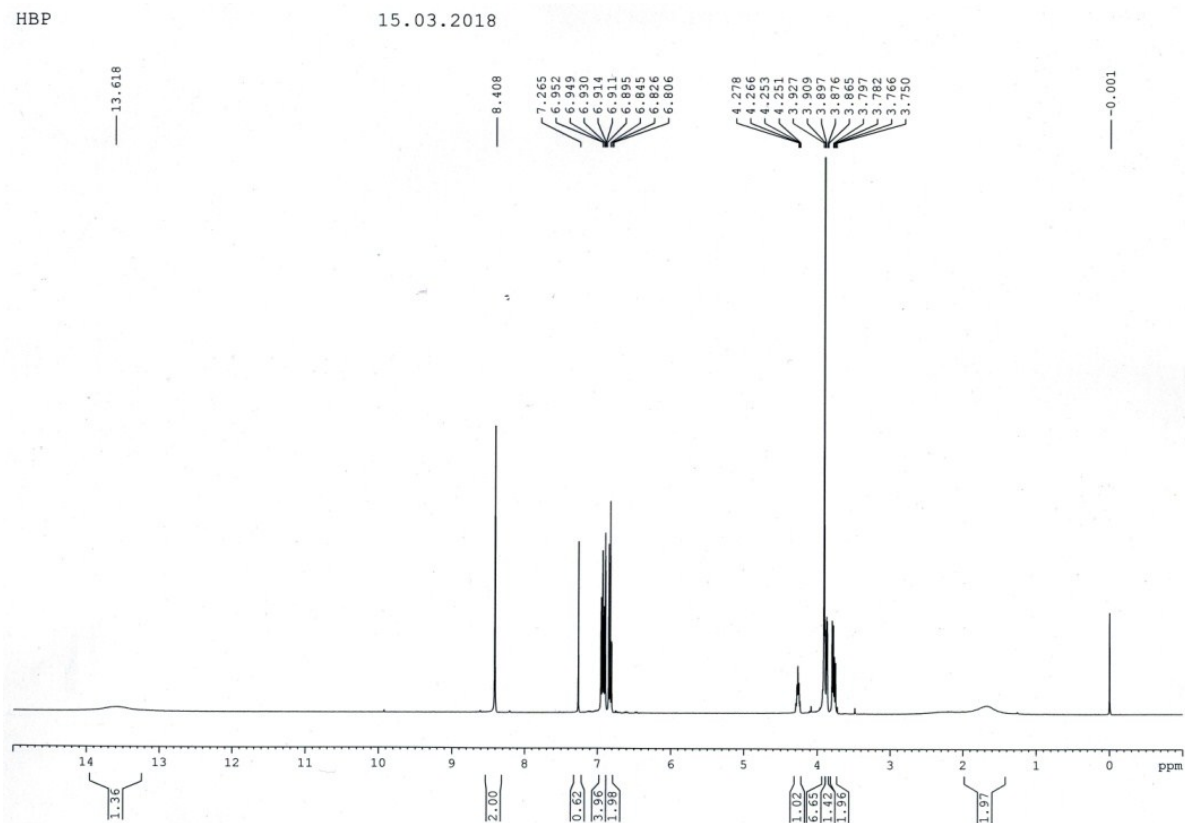

Figure S1:  $^1\text{H}$  NMR spectrum of HBP in  $\text{CDCl}_3$  at 298K.

### 2. IR spectral data:

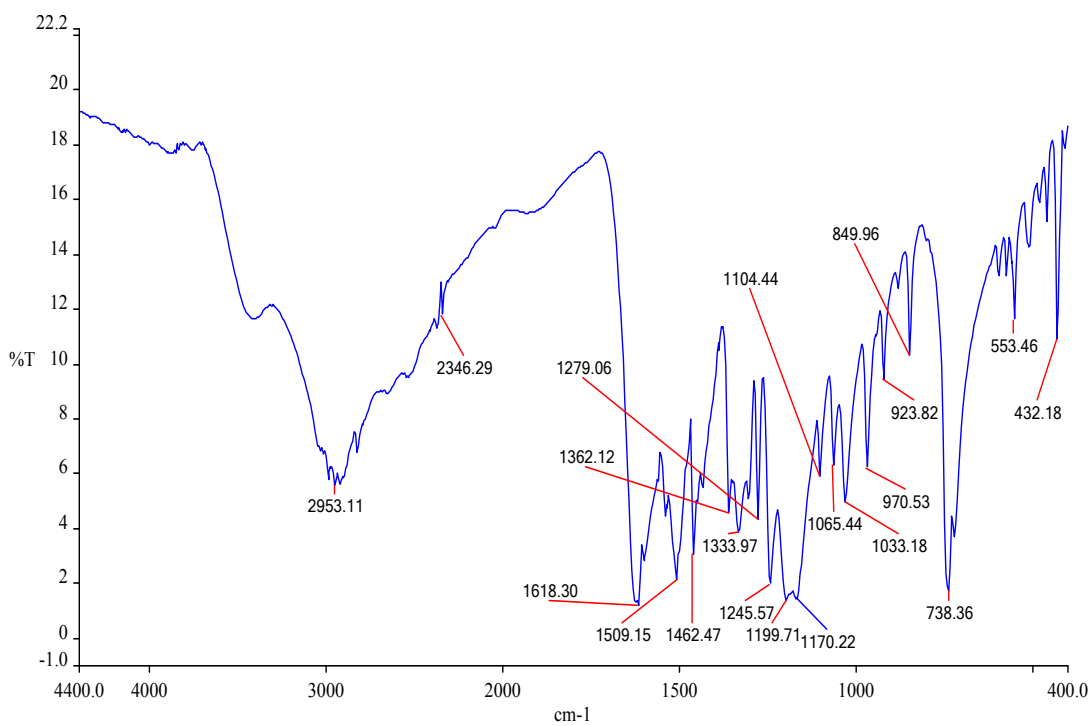

Figure S2: IR spectrum of HBP.

### 3. Mass data:

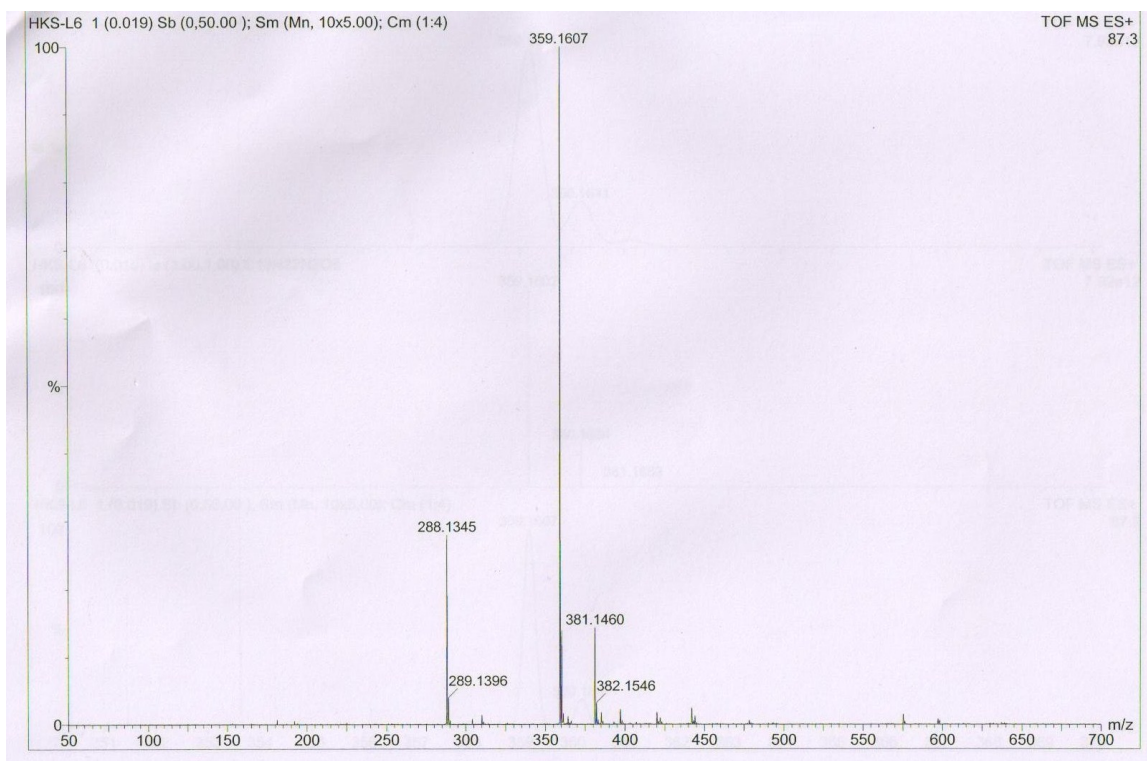

### 4. Elemental analysis data of HBP:

INDIAN ASSOCIATION FOR THE CULTIVATION OF SCIENCE  
Department of Inorganic Chemistry

Name of applicant:..... *A. Kondal* .....  
Date of report :..... *2/12/12* ..... Analysis No.....

Ref.No.                      Carbon(%)      Hydrogen(%)      Nitrogen(%)

*PMN* →                      — 31.39                      — 3.26                      — 9.99

Analyst..... *Mishra* ..... In-Charge of Elemental Analyzer, CSS

### 5. 3D Emission response:

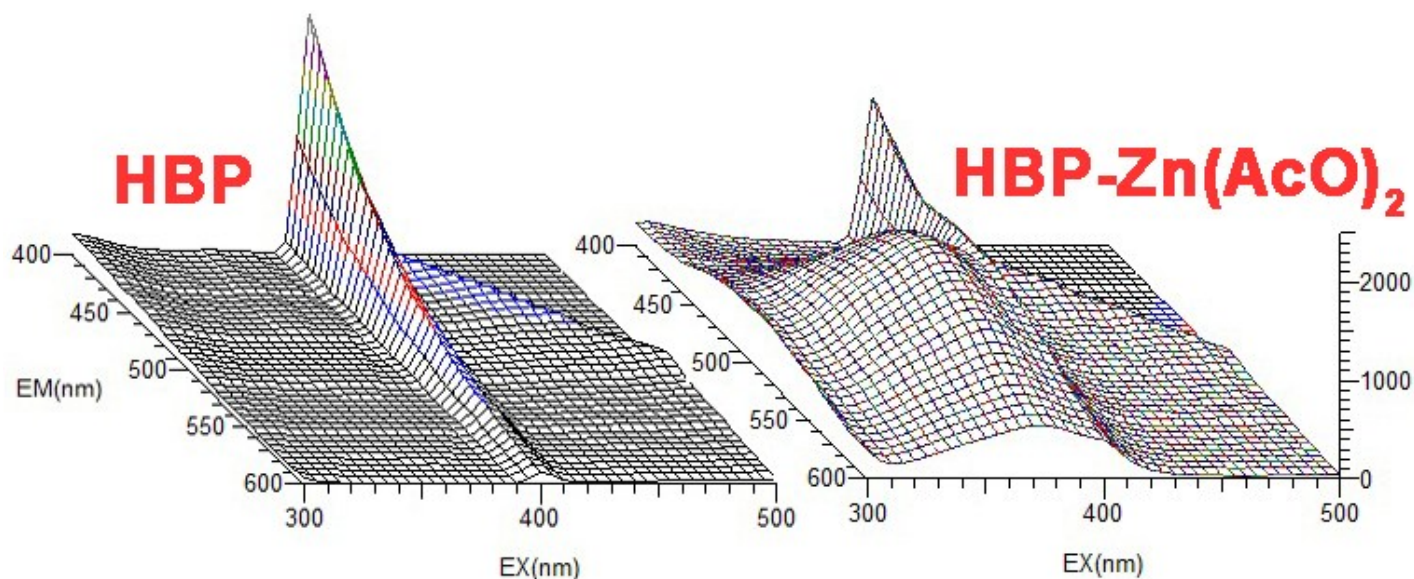

**Fig. S4:** 3D emission spectra of HBP (left) and its Zinc acetate complex (right) varying excitation wavelength from 300 nm to 500 nm with emission wavelength ranging between 400 nm - 600 nm ; [HBP] = 9.9  $\mu$ M; [Zn(AcO)<sub>2</sub>]<sub>Final</sub> = 106  $\mu$ M; Temp 298K.

### 6. Solvent effect on emission spectra of HBP:

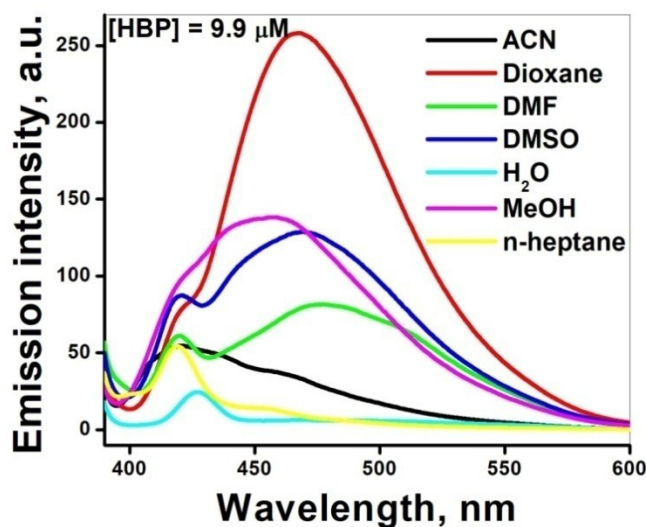

**Fig. S5** Effect of solvent polarity on the emission spectra of HBP in solvents with different polarities ( $\epsilon_{\text{ACN}} = 5.8$ ;  $\epsilon_{\text{Dioxan}} = 4.8$ ;  $\epsilon_{\text{DMF}} = 6.4$ ;  $\epsilon_{\text{DMSO}} = 7.2$ ;  $\epsilon_{\text{Water}} = 10.2$ ;  $\epsilon_{\text{MeOH}} = 5.1$ ;  $\epsilon_{\text{heptane}} = 0.1$ );  $\lambda_{\text{ex}} = 370$  nm; [HBP] = 9.9  $\mu$ M; Temp 298K.

## 7. Selectivity of HBP towards $\text{Zn}(\text{AcO})_2$ in 1:1 condition

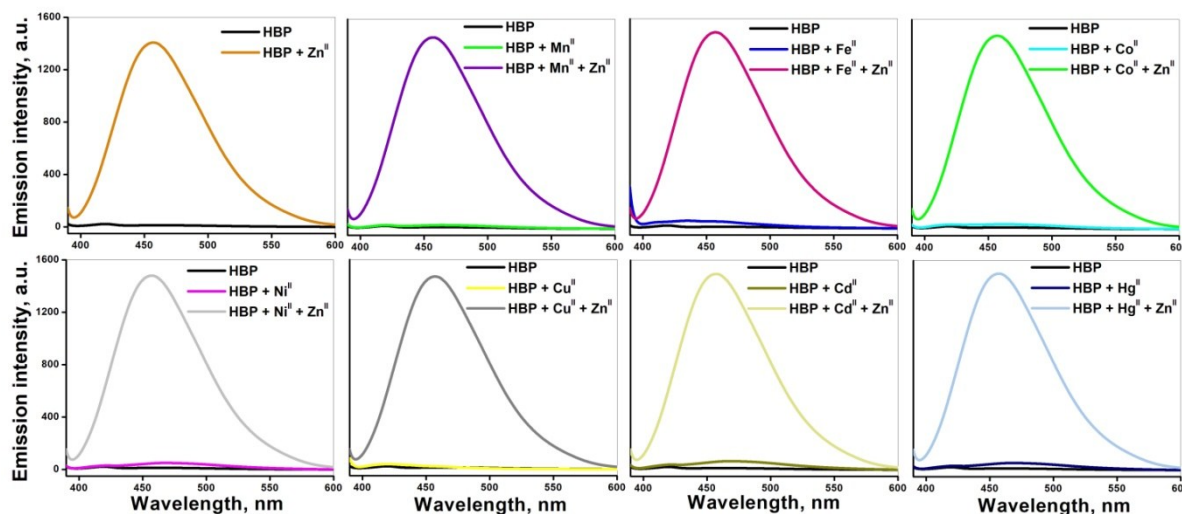

**Fig. S6:** Emission spectra of cation selectivity for  $\text{Zn}^{\text{II}}$  sensing of HBP for (a) 1:1 ion-pair situation;  $\lambda_{\text{ex}} = 370$  nm;  $\lambda_{\text{em}} = 457$  nm;  $[\text{HBP}] = 9.9 \mu\text{M}$ ;  $[\text{M}(\text{AcO})_2]_{\text{Final}} = 106 \mu\text{M}$ ; Temp 298K. (M = metal ions).

## 8. Selectivity of HBP towards $\text{Zn}(\text{AcO})_2$ in the presence of other competitive metal salts

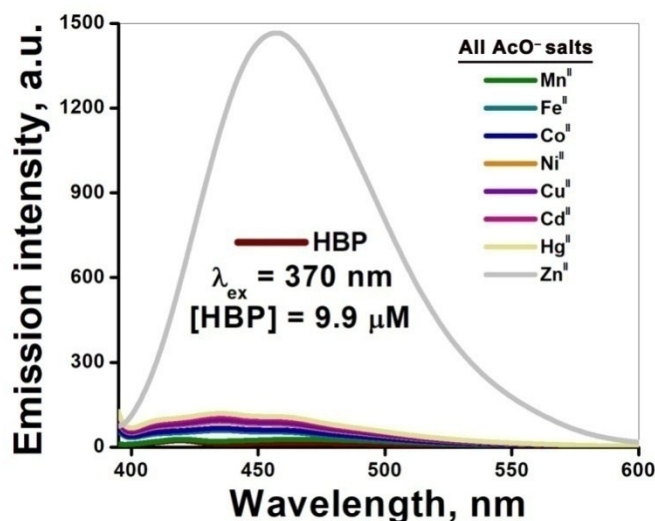

**Fig. S7:** Emission spectra to show the  $\text{Zn}^{\text{II}}$  specificity within the diversified crowd of common and similar cations ( $\text{Mn}^{\text{II}}$ ,  $\text{Fe}^{\text{II}}$ ,  $\text{Co}^{\text{II}}$ ,  $\text{Ni}^{\text{II}}$ ,  $\text{Cu}^{\text{II}}$ ,  $\text{Cd}^{\text{II}}$  &  $\text{Hg}^{\text{II}}$ ) including 1<sup>st</sup> transition metal series and some from the group where  $\text{Zn}^{\text{II}}$  belongs;  $\lambda_{\text{ex}} = 370$  nm;  $\lambda_{\text{em}} = 457$  nm;  $[\text{HBP}] = 9.9 \mu\text{M}$ ;  $[\text{Zn}(\text{X})_n]_{\text{Final}} = 106 \mu\text{M}$ ; Temp 298K. (M = metal ions; X = different anions).

## 9. Selectivity of HBP towards $Zn^{II}$ and $AcO^-$ ion-pair from independent source

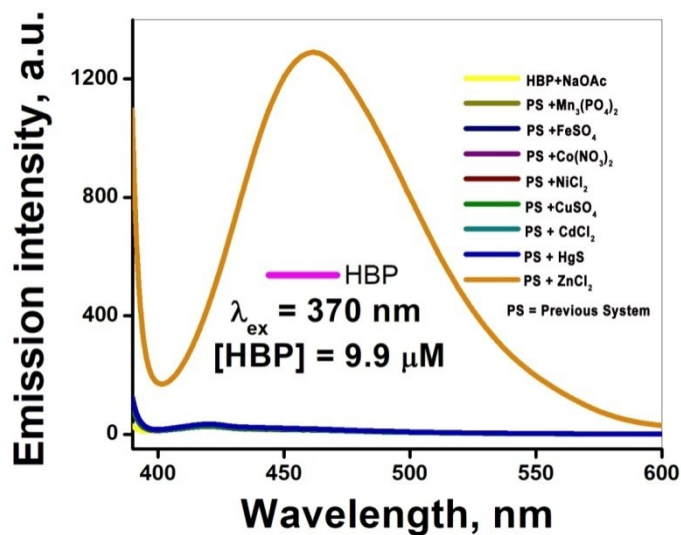

**Fig. S8:** Emission spectra of selectivity of HBP towards  $Zn(AcO)_2$  where the anionic part of the salt came from NaAcO and the cationic part was contributed by  $ZnCl_2$  within their addition, various types of other metal salts were added ( $\approx 12$  equivalent of all salts added;  $\lambda_{ex} = 370$  nm;  $\lambda_{em} = 457$  nm;  $[HBP] = 9.9 \mu M$ ;  $[M(X)_n]_{Final} = 106 \mu M$ ; Temp 298K. (M = metal ions; X = different anions)).

## 10. Fluorescence Quantum yield measurements

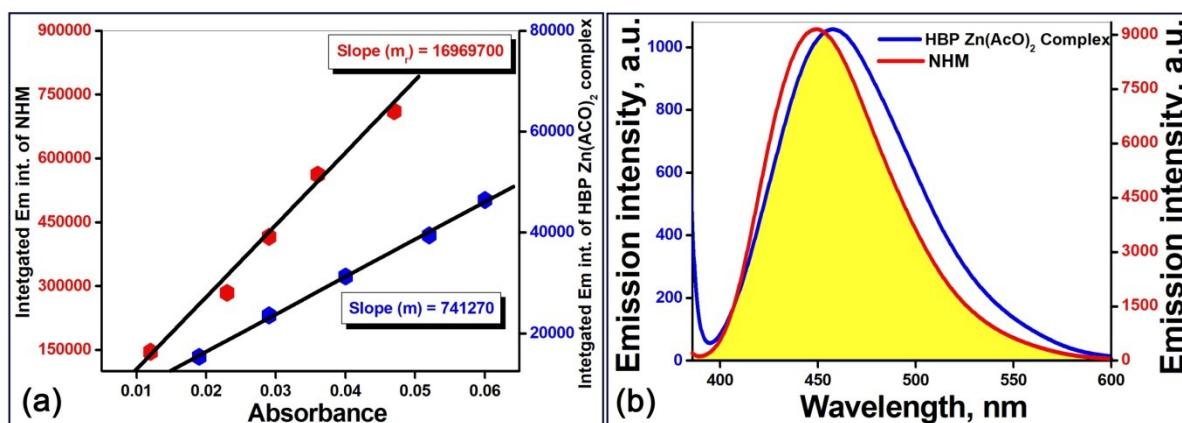

**Fig. S9:** (a) Plot of integrated emission intensity vs absorbance for norharmane (Standard) and HBP- $Zn(AcO)_2$  complex; Fig. S9(b) represented the choice of norharmane as reference for HBP- $Zn(AcO)_2$  complex indicating significant spectral overlap of emission spectral pattern with 370 nm excitation wavelength for both.

### 11. Limit of Detection (LOD):

To calculate the limit of detection, the  $\frac{I_x - I_0}{I_{\max} - I_0}$  values were plotted along abscissa and the  $\text{Zn}(\text{AcO})_2$  concentrations (at lower range) were plotted along ordinate following the data set below.

$$I_0 = 15.54, I_{\max} = 1466, I_{\max} - I_0 = 1450.46.$$

**Table S1:**

| Conc. of $\text{Zn}(\text{AcO})_2$ ( $\mu\text{M}$ ) | $I_x$ | $I_x - I_0$ | $(I_x - I_0)/(I_{\max} - I_0)$ |
|------------------------------------------------------|-------|-------------|--------------------------------|
| 5.83                                                 | 109.6 | 94.06       | 0.064848393                    |
| 11.3                                                 | 156.4 | 140.86      | 0.097114019                    |
| 17.3                                                 | 178   | 162.46      | 0.112005846                    |
| 23                                                   | 197.8 | 182.26      | 0.125656688                    |
| 28.7                                                 | 224.6 | 209.06      | 0.144133585                    |
| 34.1                                                 | 266.0 | 250.46      | 0.172679426                    |

Then, the data points were fitted following the equation  $Y = A + B * X$  (The best fitted line cut the X axis at  $0.049 \mu\text{M}$ . Hence, the limit of detection for  $\text{Zn}(\text{AcO})_2$  by HBP is considered to be  $49 \text{ nM}$ ).

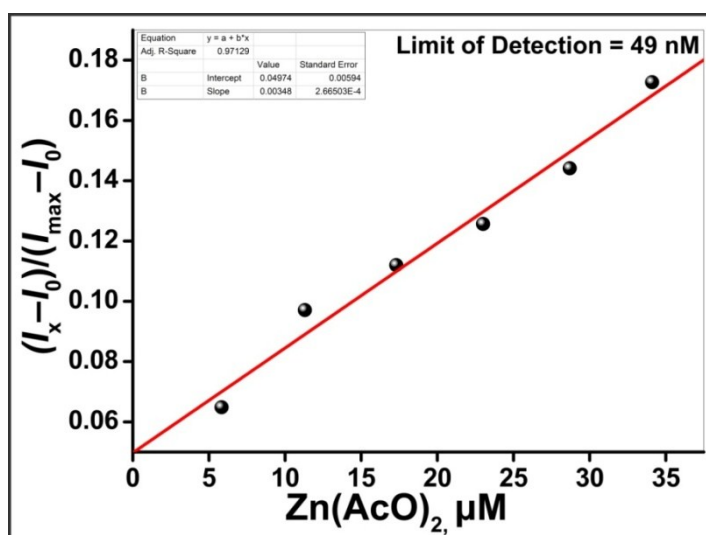

**Fig. S10:** The normalized emission intensity vs concentration of  $\text{Zn}(\text{AcO})_2$  plot for calculating the limit of detection for  $\text{Zn}(\text{AcO})_2$  by HBP ([HBP] =  $9.9 \mu\text{M}$ , Temp. =  $298\text{K}$ )
